# Supplementary material for: A Global Airport-Based Risk Model for the Spread of Dengue Infection via the Air Transport Network
Source: PubMed Central journal article supplement (PMC3756962; doi:10.1371/journal.pone.0072129), 2013-08-29
Supplement: pone.0072129.s002.pdf [file pone.0072129.s002.pdf]

### Top 100 Destination Risk Airports Ranked by Relative Risk

| Rank | Relative Risk | IATA code | Airport city     | Airport name                              | Airport Country |
|------|---------------|-----------|------------------|-------------------------------------------|-----------------|
| 1    | 1.000         | MNL       | Manila           | Ninoy Aquino Intl                         | Philippines     |
| 2    | 0.637         | CGK       | Jakarta          | Soekarno-Hatta International              | Indonesia       |
| 3    | 0.579         | CGH       | Sao Paulo        | Congonhas                                 | Brazil          |
| 4    | 0.449         | BOM       | Mumbai           | Chhatrapati Shivaji                       | India           |
| 5    | 0.313         | SDU       | Rio De Janeiro   | Santos Dumont                             | Brazil          |
| 6    | 0.284         | DEL       | Delhi            | Indira Gandhi Intl                        | India           |
| 7    | 0.257         | GRU       | Sao Paulo        | Guarulhos Intl                            | Brazil          |
| 8    | 0.254         | BKK       | Bangkok          | International                             | Thailand        |
| 9    | 0.206         | SGN       | Ho Chi Minh City | Tan Son Nhat                              | Vietnam         |
| 10   | 0.202         | HKG       | Hong Kong        | Hong Kong International                   | Hong Kong       |
| 11   | 0.178         | LOS       | Lagos            | Murtala Muhammed                          | Nigeria         |
| 12   | 0.113         | CCU       | Kolkata          | Netaji Subhas Chandra                     | India           |
| 13   | 0.109         | SIN       | Singapore        | Changi                                    | Singapore       |
| 14   | 0.094         | DAC       | Dhaka            | Zia International                         | Bangladesh      |
| 15   | 0.084         | NRT       | Tokyo            | Narita                                    | Japan           |
| 16   | 0.083         | SUB       | Surabaya         | Juanda                                    | Indonesia       |
| 17   | 0.072         | TZA       | Belize City      | Municipal                                 | Belize          |
| 18   | 0.068         | CNF       | Belo Horizonte   | Tancredo Neves International Airport      | Brazil          |
| 19   | 0.062         | BZE       | Belize City      | Philip S.W.Goldson Int                    | Belize          |
| 20   | 0.062         | BLR       | Bangalore        | Hal                                       | India           |
| 21   | 0.058         | KUL       | Kuala Lumpur     | Kuala Lumpur International Airport (klia) | Malaysia        |
| 22   | 0.057         | DMK       | Bangkok          | Don Muang Airport                         | Thailand        |
| 23   | 0.057         | ICN       | Seoul            | Seoul (Incheon)                           | South Korea     |
| 24   | 0.055         | MEX       | Mexico City      | Juarez International                      | Mexico          |
| 25   | 0.052         | TSA       | Taipei           | Sung Shan                                 | Taiwan          |
| 26   | 0.052         | AEP       | Buenos Aires     | Arpt. Jorge Newbery                       | Argentina       |
| 27   | 0.043         | HAN       | Hanoi            | Noibai International                      | Vietnam         |
| 28   | 0.043         | HND       | Tokyo            | Haneda                                    | Japan           |
| 29   | 0.043         | KHH       | Kaohsiung        | International                             | Taiwan          |
| 30   | 0.041         | TPE       | Taipei           | Chiang Kai Shek                           | Taiwan          |
| 31   | 0.035         | CCS       | Caracas          | Maiquetia                                 | Venezuela       |
| 32   | 0.033         | REC       | Recife           | Guararapes Intl                           | Brazil          |
| 33   | 0.030         | CGP       | Chittagong       | Patenga                                   | Bangladesh      |
| 34   | 0.029         | EZE       | Buenos Aires     | Ezeiza Ministro Pistarini                 | Argentina       |
| 35   | 0.027         | FOR       | Fortaleza        | Pinto Martins                             | Brazil          |
| 36   | 0.027         | SSA       | Salvador         | Arpt Luis R. Magalhaes                    | Brazil          |
| 37   | 0.024         | CEB       | Cebu             | Mactan International                      | Philippines     |
| 38   | 0.022         | UPG       | Ujung Pandang    | Hasanudin                                 | Indonesia       |
| 39   | 0.022         | HYD       | Hyderabad        | Begumpet Airport                          | India           |
| 40   | 0.020         | MES       | Medan            | Polania                                   | Indonesia       |
| 41   | 0.020         | CWB       | Curitiba         | Afonso Pena International Airport         | Brazil          |
| 42   | 0.020         | JFK       | New York         | John F Kennedy Intl                       | United States   |
| 43   | 0.019         | KIX       | Osaka            | Kansai International                      | Japan           |
| 44   | 0.018         | KHI       | Karachi          | Quaid-E-Azam Intl                         | Pakistan        |
| 45   | 0.017         | RGN       | Yangon           | Mingaladon                                | Myanmar         |
| 46   | 0.017         | POA       | Porto Alegre     | Salgado Filho                             | Brazil          |
| 47   | 0.016         | VCP       | Sao Paulo        | Viracopos                                 | Brazil          |
| 48   | 0.015         | BOG       | Bogota           | Eldorado                                  | Colombia        |

|    |       |     |                    |                                        |                |
|----|-------|-----|--------------------|----------------------------------------|----------------|
| 49 | 0.014 | NBO | Nairobi            | Jomo Kenyatta International            | Kenya          |
| 50 | 0.013 | PLU | Belo Horizonte     | Pampulha                               | Brazil         |
| 51 | 0.013 | DPS | Denpasar Bali      | Ngurah Rai                             | Indonesia      |
| 52 | 0.012 | HAV | Havana             | Jose Marti Intl                        | Cuba           |
| 53 | 0.011 | PLM | Palembang          | Mahmud Badaruddin Ii                   | Indonesia      |
| 54 | 0.011 | BEL | Belem              | Val De Cans                            | Brazil         |
| 55 | 0.011 | SRG | Semarang           | Achmad Yani                            | Indonesia      |
| 56 | 0.011 | DVO | Davao              | Francisco Bangoy International Airport | Philippines    |
| 57 | 0.011 | PHC | Port Harcourt      | Port Harcourt                          | Nigeria        |
| 58 | 0.010 | KNH | Kinmen             | Shang-Yi                               | Taiwan         |
| 59 | 0.010 | PAC | Panama City        | Paitilla                               | Panama         |
| 60 | 0.009 | MAO | Manaus             | Eduardo Gomes Intl                     | Brazil         |
| 61 | 0.009 | GYE | Guayaquil          | Simon Bolivar                          | Ecuador        |
| 62 | 0.009 | COK | Kochi              | Kochi                                  | India          |
| 63 | 0.009 | GYN | Goiania            | Santa Genoveva                         | Brazil         |
| 64 | 0.009 | LHE | Lahore             | Alama Iqbal International              | Pakistan       |
| 65 | 0.009 | DAD | Da Nang            | Da Nang                                | Vietnam        |
| 66 | 0.008 | JOG | Yogyakarta         | Adisutjipto                            | Indonesia      |
| 67 | 0.008 | PNH | Phnom Penh         | Phnom Penh International               | Cambodia       |
| 68 | 0.007 | MIA | Miami              | Miami International Airport            | United States  |
| 69 | 0.007 | UIO | Quito              | Mariscal Sucre                         | Ecuador        |
| 70 | 0.007 | ACC | Accra              | Kotoka                                 | Ghana          |
| 71 | 0.007 | RMQ | Taichung           | ChingChuanKang                         | Taiwan         |
| 72 | 0.006 | CKG | Chongqing          | Chongqing Jiangbei International       | China          |
| 73 | 0.006 | NAS | Nassau             | Intl                                   | Bahamas        |
| 74 | 0.006 | ILO | Iloilo             | Mandurriao                             | Philippines    |
| 75 | 0.006 | PTY | Panama City        | Tocumen International                  | Panama         |
| 76 | 0.006 | LKO | Lucknow            | Amausi                                 | India          |
| 77 | 0.006 | TRV | Thiruvananthapuram | International                          | India          |
| 78 | 0.006 | TNN | Tainan             | Tainan                                 | Taiwan         |
| 79 | 0.005 | SZB | Kuala Lumpur       | Sultan Abdul Aziz Shah                 | Malaysia       |
| 80 | 0.005 | JAI | Jaipur             | Sanganer                               | India          |
| 81 | 0.005 | NAT | Natal              | Augusto Severo                         | Brazil         |
| 82 | 0.005 | AMD | Ahmedabad          | Ahmedabad                              | India          |
| 83 | 0.005 | SJU | San Juan           | Luis Munoz Marin Intl                  | Puerto Rico    |
| 84 | 0.005 | IAH | Houston            | George Bush Intercontl.                | United States  |
| 85 | 0.005 | MAR | Maracaibo          | La Chinita                             | Venezuela      |
| 86 | 0.005 | MTY | Monterrey          | Gen Mariano Escobedo                   | Mexico         |
| 87 | 0.005 | RAO | Ribeirao Preto     | Leite Lopes                            | Brazil         |
| 88 | 0.005 | VIX | Vitoria            | Eurico Sales                           | Brazil         |
| 89 | 0.005 | PNQ | Pune               | Lohegaon                               | India          |
| 90 | 0.005 | CLO | Cali               | Alfonso B. Aragon                      | Colombia       |
| 91 | 0.004 | AMI | Mataram            | Selaparang                             | Indonesia      |
| 92 | 0.004 | BNI | Benin City         | Benin City                             | Nigeria        |
| 93 | 0.004 | SYD | Sydney             | Kingsford Smith                        | Australia      |
| 94 | 0.004 | MCZ | Maceio             | Palmares                               | Brazil         |
| 95 | 0.004 | LHR | London             | Heathrow                               | United Kingdom |
| 96 | 0.004 | LIM | Lima               | J Chavez Intl                          | Peru           |
| 97 | 0.004 | KTM | Kathmandu          | Tribhuvan                              | Nepal          |
| 98 | 0.004 | CUK | Caye Caulker       | Caye Caulker                           | Belize         |

|     |       |     |             |              |        |
|-----|-------|-----|-------------|--------------|--------|
| 99  | 0.004 | CJB | Coimbatore  | Peelamedu    | India  |
| 100 | 0.004 | GDL | Guadalajara | Miguel Hidal | Mexico |
